# Supplementary material
Source: HighWire-hosted journal article supplement (https://bmjopen.bmj.com/content/13/5/e071514)
Supplement: inline-supplementary-material-1 [file inline-supplementary-material-1.pdf]

eTable 1. Individual toxicants by NHANES Cycle (2007-2016)

| Toxicant                                                        | All (2007-2016) |                             | 2007-2008 |                            | 2009-2010 |                            | 2011-2012 |                             | 2013-2014 |                             | 2015-2016 |                             |
|-----------------------------------------------------------------|-----------------|-----------------------------|-----------|----------------------------|-----------|----------------------------|-----------|-----------------------------|-----------|-----------------------------|-----------|-----------------------------|
|                                                                 | N missing       | Statistics                  | N missing | Statistics                 | N missing | Statistics                 | N missing | Statistics                  | N missing | Statistics                  | N missing | Statistics                  |
| <b>PAHs*</b>                                                    |                 |                             |           |                            |           |                            |           |                             |           |                             |           |                             |
| Unweighted N                                                    |                 | 7,090                       |           | 1,390                      |           | 1,510                      |           | 1,354                       |           | 1,414                       |           | 1,422                       |
| Weighted N                                                      |                 | 173,544,330                 |           | 33,185,220                 |           | 34,708,969                 |           | 35,108,975                  |           | 34,911,478                  |           | 35,629,688                  |
| 1-hydroxynaphthalene (ng/L), median [Q1, Q3]                    | 130             | 1558.7<br>[651.8, 5309.9]   | 57        | 2223.5<br>[901.3, 8247.8]  | 0         | 1830.8<br>[757.7, 5640.7]  | 0         | 1597.2<br>[636.2, 4970.6]   | 7         | 1249.1<br>[537.4, 3869.7]   | 66        | 1271.1<br>[542.1, 3893.9]   |
| 2-hydroxynaphthalene (ng/L), median [Q1, Q3]                    | 62              | 4225.5<br>[1868.4, 10121.4] | 33        | 3891.4<br>[1877.6, 9396.9] | 0         | 3522.7<br>[1569.8, 8250.6] | 0         | 4436.5<br>[1906.4, 10645.0] | 4         | 4237.6<br>[1770.6, 10310.5] | 25        | 5262.7<br>[2274.6, 11616.5] |
| 3-hydroxyfluorene (ng/L), median [Q1, Q3]                       | 25              | 79.7<br>[38.7, 226.8]       | 15        | 97.7<br>[48.5, 342.2]      | 2         | 78.5<br>[39.0, 217.6]      | 4         | 78.4<br>[40.3, 225.2]       | 0         | 68.6<br>[31.4, 194.6]       | 4         | 74.3<br>[32.0, 198.1]       |
| 2-hydroxyfluorene (ng/L), median [Q1, Q3]                       | 11              | 213.8<br>[101.9, 524.5]     | 11        | 280.0<br>[143.8, 796.0]    | 0         | 221.3<br>[107.3, 539.5]    | 0         | 227.6<br>[110.4, 585.2]     | 0         | 159.6<br>[80.5, 416.6]      | 0         | 181.8<br>[84.1, 413.5]      |
| 3-hydroxyphenanthrene (ng/L), median [Q1, Q3]                   | 2842            | 75.9<br>[38.0, 154.2]       | 5         | 103.2<br>[53.5, 190.3]     | 1         | 70.5<br>[35.5, 133.0]      | 0         | 63.0<br>[30.5, 134.1]       | 1414      | ---                         | 1422      | ---                         |
| 1-hydroxyphenanthrene (ng/L), median [Q1, Q3]                   | 1               | 122.8<br>[64.8, 225.8]      | 0         | 145.7<br>[80.9, 259.7]     | 1         | 140.5<br>[72.8, 239.3]     | 0         | 131.3<br>[70.5, 252.2]      | 0         | 95.6<br>[52.1, 178.8]       | 0         | 102.6<br>[56.7, 195.1]      |
| 2-hydroxyphenanthrene (ng/L), median [Q1, Q3]                   | 2855            | 67.0<br>[36.4, 124.0]       | 17        | 69.4<br>[38.0, 128.2]      | 1         | 68.1<br>[36.2, 120.3]      | 1         | 64.1<br>[34.2, 124.2]       | 1414      | ---                         | 1422      | ---                         |
| 1-hydroxypyrene (ng/L), median [Q1, Q3]                         | 25              | 114.7<br>[50.0, 224.6]      | 22        | 123.3<br>[58.6, 234.7]     | 0         | 114.7<br>[53.5, 225.6]     | 2         | 109.9<br>[53.6, 215.7]      | 0         | 115.3<br>[49.5, 222.5]      | 1         | 107.8<br>[49.5, 208.5]      |
| 9-hydroxyfluorene (ng/L), median [Q1, Q3]                       | 2836            | 294.2<br>[139.2, 610.9]     | 0         | 364.4<br>[177.8, 716.9]    | 0         | 266.6<br>[128.5, 552.9]    | 0         | 266.0<br>[119.9, 546.9]     | 1414      | ---                         | 1422      | ---                         |
| <b>PHTHTEs†</b>                                                 |                 |                             |           |                            |           |                            |           |                             |           |                             |           |                             |
| Unweighted N                                                    |                 | 7,024                       |           | 1,386                      |           | 1,511                      |           | 1,352                       |           | 1,425                       |           | 1,350                       |
| Weighted N                                                      |                 | 174,032,721                 |           | 33,073,405                 |           | 34,766,079                 |           | 35,067,724                  |           | 35,244,749                  |           | 35,880,763                  |
| Mono(carboxynonyl) Phthalate (ng/mL), median [Q1, Q3]           | 0               | 2.3<br>[1.2, 4.6]           | 0         | 2.2<br>[1.2, 4.4]          | 0         | 2.8<br>[1.4, 5.7]          | 0         | 2.3<br>[1.1, 4.7]           | 0         | 2.5<br>[1.3, 5.4]           | 0         | 1.6<br>[0.78, 3.0]          |
| Mono(carboxyoctyl) Phthalate (ng/mL), median [Q1, Q3]           | 0               | 10.4<br>[4.3, 31.3]         | 0         | 6.0<br>[2.9, 13.6]         | 0         | 11.1<br>[4.4, 31.9]        | 0         | 18.2<br>[6.8, 52.9]         | 0         | 18.0<br>[7.4, 53.5]         | 0         | 6.7<br>[3.2, 16.5]          |
| Mono-2-ethyl-5-carboxypentyl phthalate (ng/mL), median [Q1, Q3] | 0               | 13.7<br>[6.5, 28.2]         | 0         | 29.8<br>[14.7, 62.2]       | 0         | 18.9<br>[9.5, 38.6]        | 0         | 12.9<br>[6.3, 24.5]         | 0         | 10.1<br>[5.0, 18.2]         | 0         | 8.4<br>[4.0, 16.1]          |

|                                                              |      |                       |     |                       |     |                       |      |                       |    |                      |   |                      |
|--------------------------------------------------------------|------|-----------------------|-----|-----------------------|-----|-----------------------|------|-----------------------|----|----------------------|---|----------------------|
| Mono-n-butyl phthalate (ng/mL), median [Q1, Q3]              | 0    | 12.0<br>[5.5, 23.5]   | 0   | 18.8<br>[9.4, 34.5]   | 0   | 14.9<br>[7.0, 28.6]   | 0    | 8.5<br>[3.4, 19.2]    | 0  | 9.4<br>[4.2, 18.0]   | 0 | 10.0<br>[5.3, 18.4]  |
| Mono-(3-carboxypropyl) phthalate (ng/mL), median [Q1, Q3]    | 0    | 2.1<br>[0.89, 4.9]    | 0   | 2.4<br>[1.2, 5.0]     | 0   | 2.9<br>[1.3, 6.0]     | 0    | 2.6<br>[1.2, 6.5]     | 0  | 1.8<br>[0.75, 4.8]   | 0 | 0.91<br>[0.32, 2.0]  |
| Mono-ethyl phthalate (ng/mL), median [Q1, Q3]                | 0    | 44.5<br>[16.5, 137.9] | 0   | 87.2<br>[34.1, 268.4] | 0   | 62.5<br>[23.0, 189.5] | 0    | 33.3<br>[13.3, 107.6] | 0  | 31.4<br>[12.6, 86.8] | 0 | 28.4<br>[11.7, 89.5] |
| Mono-(2-ethyl-5-oxohexyl) phthalate (ng/mL), median [Q1, Q3] | 0    | 5.5<br>[2.6, 11.4]    | 0   | 10.7<br>[5.2, 25.4]   | 0   | 7.7<br>[3.6, 15.3]    | 0    | 5.0<br>[2.5, 9.7]     | 0  | 4.3<br>[1.9, 7.6]    | 0 | 3.4<br>[1.6, 6.7]    |
| Mono-benzyl phthalate (ng/mL), median [Q1, Q3]               | 0    | 4.8<br>[2.0, 11.5]    | 0   | 7.2<br>[3.1, 16.0]    | 0   | 6.1<br>[2.6, 13.2]    | 0    | 3.9<br>[1.8, 9.8]     | 0  | 4.1<br>[1.7, 9.2]    | 0 | 3.9<br>[1.6, 8.9]    |
| <b>VOCs<sup>‡</sup></b>                                      |      |                       |     |                       |     |                       |      |                       |    |                      |   |                      |
| Unweighted N                                                 |      | 7,090                 |     | 1,390                 |     | 1,510                 |      | 1,354                 |    | 1,414                |   | 1,422                |
| Weighted N                                                   |      | 173,544,330           |     | 33,185,220            |     | 34,708,969            |      | 35,108,975            |    | 34,911,478           |   | 35,629,688           |
| Toluene (ng/mL), median [Q1, Q3]                             | 2851 | 0.07<br>[0.05, 0.17]  | 181 | 0.09<br>[0.05, 0.22]  | 772 | 0.07<br>[0.04, 0.18]  | 1818 | ---                   | 71 | 0.07<br>[0.05, 0.14] | 9 | 0.07<br>[0.05, 0.15] |

-- : Not available

\*PAH subset (n = 7,090) and corresponding subsample weights used

† PHT subset (n = 7,024) and corresponding subsample weights used

‡VOC subset (n = 7,129) and corresponding subsample weights used

SAS Survey Procedures used for all analyses.

eTable 2. Individual toxicants by group, NHANES 2007-2016

| Toxicant                                                        | No Rheumatoid Arthritis |                          | Rheumatoid Arthritis |                          | p-value                      |
|-----------------------------------------------------------------|-------------------------|--------------------------|----------------------|--------------------------|------------------------------|
|                                                                 | N Missing               | Statistics               | N Missing            | Statistics               |                              |
| <b>PAHs*</b>                                                    |                         |                          |                      |                          |                              |
| Unweighted N                                                    |                         | 6,654                    |                      | 436                      | ---                          |
| Weighted N                                                      |                         | 165,527,760              |                      | 8,016,570                | ---                          |
| 1-hydroxynaphthalene (ng/L), median [Q1, Q3]                    | 113                     | 1526.8 [644.1, 5152.0]   | 17                   | 2364.6 [784.5, 8555.8]   | <b>&lt;0.001<sup>b</sup></b> |
| 2-hydroxynaphthalene (ng/L), median [Q1, Q3]                    | 50                      | 4222.2 [1852.4, 10052.7] | 12                   | 4300.3 [2126.1, 10533.7] | 0.10 <sup>b</sup>            |
| 3-hydroxyfluorene (ng/L), median [Q1, Q3]                       | 23                      | 79.8 [38.0, 225.3]       | 2                    | 75.2 [39.8, 268.5]       | 0.38 <sup>b</sup>            |
| 2-hydroxyfluorene (ng/L), median [Q1, Q3]                       | 9                       | 213.5 [101.7, 523.6]     | 2                    | 226.0 [118.7, 608.6]     | 0.17 <sup>b</sup>            |
| 3-hydroxyphenanthrene (ng/L), median [Q1, Q3]                   | 2695                    | 76.0 [38.0, 154.3]       | 147                  | 71.0 [37.9, 152.8]       | 0.75 <sup>b</sup>            |
| 1-hydroxyphenanthrene (ng/L), median [Q1, Q3]                   | 1                       | 122.6 [64.0, 225.9]      | 0                    | 122.9 [73.7, 222.3]      | 0.63 <sup>b</sup>            |
| 2-hydroxyphenanthrene (ng/L), median [Q1, Q3]                   | 2705                    | 67.7 [36.4, 124.0]       | 150                  | 61.9 [36.7, 111.9]       | 0.79 <sup>b</sup>            |
| 1-hydroxypyrene (ng/L), median [Q1, Q3]                         | 20                      | 115.9 [51.0, 225.7]      | 5                    | 105.1 [49.4, 209.0]      | 0.22 <sup>b</sup>            |
| 9-hydroxyfluorene (ng/L), median [Q1, Q3]                       | 2690                    | 291.2 [138.6, 604.5]     | 146                  | 336.9 [160.6, 659.2]     | 0.095 <sup>b</sup>           |
| <b>PHTHTEs†</b>                                                 |                         |                          |                      |                          |                              |
| Unweighted N                                                    |                         | 6,556                    |                      | 468                      | ---                          |
| Weighted N                                                      |                         | 165,218,598              |                      | 8,814,123                | ---                          |
| Mono(carboxynonyl) Phthalate (ng/mL), median [Q1, Q3]           | 0                       | 2.3 [1.2, 4.6]           | 0                    | 2.2 [1.00, 4.3]          | 0.2 <sup>b</sup>             |
| Mono(carboxyoctyl) Phthalate (ng/mL), median [Q1, Q3]           | 0                       | 10.5 [4.3, 31.3]         | 0                    | 9.4 [4.2, 28.1]          | 0.52 <sup>b</sup>            |
| Mono-2-ethyl-5-carboxypentyl phthalate (ng/mL), median [Q1, Q3] | 0                       | 13.7 [6.5, 28.2]         | 0                    | 14.1 [6.5, 27.7]         | 0.75 <sup>b</sup>            |
| Mono-n-butyl phthalate (ng/mL), median [Q1, Q3]                 | 0                       | 12.0 [5.5, 23.4]         | 0                    | 12.3 [6.5, 24.3]         | 0.17 <sup>b</sup>            |
| Mono-(3-carboxypropyl) phthalate (ng/mL), median [Q1, Q3]       | 0                       | 2.1 [0.89, 4.8]          | 0                    | 1.9 [0.76, 5.2]          | 0.76 <sup>b</sup>            |
| Mono-ethyl phthalate (ng/mL), median [Q1, Q3]                   | 0                       | 44.2 [16.5, 137.6]       | 0                    | 48.3 [17.5, 143.9]       | 0.28 <sup>b</sup>            |
| Mono-(2-ethyl-5-oxohexyl) phthalate (ng/mL), median [Q1, Q3]    | 0                       | 8.9 [4.0, 18.7]          | 0                    | 9.2 [4.0, 16.8]          | 0.52 <sup>b</sup>            |
| Mono-benzyl phthalate (ng/mL), median [Q1, Q3]                  | 0                       | 7.5 [3.5, 14.4]          | 0                    | 6.8 [3.5, 12.9]          | 0.43 <sup>b</sup>            |
| <b>VOCs‡</b>                                                    |                         |                          |                      |                          |                              |
| Unweighted N                                                    |                         | 9,348                    |                      | 632                      | ---                          |
| Weighted N                                                      |                         | 159,508,473              |                      | 8,249,605                | ---                          |
| Toluene (ng/mL), median [Q1, Q3]                                | 2682                    | 0.07 [0.05, 0.17]        | 169                  | 0.08 [0.05, 0.24]        | 0.092 <sup>b</sup>           |

**Bold** = Significant with p<0.05

---: Not available

Abbreviations: Polycyclic Aromatic Hydrocarbons: PAHs; PHTHTEs: Phthalates and Plasticizers Metabolites; VOCs: Volatile Organic Compounds

\*PAH subset (n = 7,090) and corresponding subsample weights used

† PHT subset (n = 7,024) and corresponding subsample weights used

‡VOC subset (n = 7,129) and corresponding subsample weights used

P-values: b=linear regression with log transformation; c=Rao-Scott chi-square test.

SAS Survey Procedures used for all analyses.

**eTable 3. Rank-based correlations between single PAH (a) and PHTHTE (b) toxicants****a.**

| PAH concentration (ng/L) | 1-hydroxynaphthalene | 2-hydroxynaphthalene | 3-hydroxyfluorene | 2-hydroxyfluorene | 1-hydroxyphenanthrene | 1-hydroxypyrene |
|--------------------------|----------------------|----------------------|-------------------|-------------------|-----------------------|-----------------|
| 1-hydroxynaphthalene     | 1.0000               | 0.5865               | 0.7300            | 0.7200            | 0.5910                | 0.5770          |
| 2-hydroxynaphthalene     | 0.5865               | 1.0000               | 0.6628            | 0.6860            | 0.5679                | 0.6235          |
| 3-hydroxyfluorene        | 0.7300               | 0.6628               | 1.0000            | 0.9565            | 0.7375                | 0.7754          |
| 2-hydroxyfluorene        | 0.7200               | 0.6860               | 0.9565            | 1.0000            | 0.7920                | 0.7871          |
| 1-hydroxyphenanthrene    | 0.5910               | 0.5679               | 0.7375            | 0.7920            | 1.0000                | 0.7958          |
| 1-hydroxypyrene          | 0.5770               | 0.6235               | 0.7754            | 0.7871            | 0.7958                | 1.0000          |

Abbreviations: Polycyclic Aromatic Hydrocarbons: PAHs  
PAH subsample weights used

**b.**

| PHTHTE concentration (ng/mL)            | Mono(carboxynonyl) phthalate | Mono(carboxyoctyl) phthalate | Mono-2-ethyl-5-carboxypentyl phthalate | Mono-n-butyl phthalate | Mono-(3-carboxypropyl) phthalate | Mono-ethyl phthalate | Mono-(2-ethyl-5-hydroxyhexyl) phthalate | Mono-isobutyl phthalate | Mono-(2-ethyl-5-oxohexyl) phthalate | Mono-benzyl phthalate |
|-----------------------------------------|------------------------------|------------------------------|----------------------------------------|------------------------|----------------------------------|----------------------|-----------------------------------------|-------------------------|-------------------------------------|-----------------------|
| Mono(carboxynonyl) phthalate            | 1.0000                       | 0.6694                       | 0.5236                                 | 0.4093                 | 0.6655                           | 0.2755               | 0.4667                                  | 0.4057                  | 0.4850                              | 0.3850                |
| Mono(carboxyoctyl) phthalate            | 0.6694                       | 1.0000                       | 0.4186                                 | 0.3035                 | 0.7215                           | 0.1702               | 0.3650                                  | 0.3619                  | 0.3922                              | 0.2986                |
| Mono-2-ethyl-5-carboxypentyl phthalate  | 0.5236                       | 0.4186                       | 1.0000                                 | 0.6302                 | 0.6183                           | 0.3959               | 0.9343                                  | 0.5337                  | 0.9416                              | 0.5224                |
| Mono-n-butyl phthalate                  | 0.4093                       | 0.3035                       | 0.6302                                 | 1.0000                 | 0.5338                           | 0.4632               | 0.6533                                  | 0.7551                  | 0.6673                              | 0.6875                |
| Mono-(3-carboxypropyl) phthalate        | 0.6655                       | 0.7215                       | 0.6183                                 | 0.5338                 | 1.0000                           | 0.3092               | 0.5891                                  | 0.4467                  | 0.6081                              | 0.4682                |
| Mono-ethyl phthalate                    | 0.2755                       | 0.1702                       | 0.3959                                 | 0.4632                 | 0.3092                           | 1.0000               | 0.3988                                  | 0.4076                  | 0.4030                              | 0.3733                |
| Mono-(2-ethyl-5-hydroxyhexyl) phthalate | 0.4667                       | 0.3650                       | 0.9343                                 | 0.6533                 | 0.5891                           | 0.3988               | 1.0000                                  | 0.5595                  | 0.9763                              | 0.5527                |
| Mono-isobutyl phthalate                 | 0.4057                       | 0.3619                       | 0.5337                                 | 0.7551                 | 0.4467                           | 0.4076               | 0.5595                                  | 1.0000                  | 0.5778                              | 0.5916                |
| Mono-(2-ethyl-5-oxohexyl) phthalate     | 0.4850                       | 0.3922                       | 0.9416                                 | 0.6673                 | 0.6081                           | 0.4030               | 0.9763                                  | 0.5778                  | 1.0000                              | 0.5693                |
| Mono-benzyl phthalate                   | 0.3850                       | 0.2986                       | 0.5224                                 | 0.6875                 | 0.4682                           | 0.3733               | 0.5527                                  | 0.5916                  | 0.5693                              | 1.0000                |

Abbreviations: PHTHTEs: Phthalates and Plasticizers Metabolites  
PHTHTE subsample weights used

eTable 4. Comparison of demographics of included versus excluded participants for the (a) PAH and PHTHTE subsets and (b) VOC subset

a.

| Variable                                            | Excluded from PAH Subset |                   | Included in PAH Subset |                   | p-value            | Excluded from PHTHTE Subset |                   | Included in PHTHTE Subset |                   | p-value           |
|-----------------------------------------------------|--------------------------|-------------------|------------------------|-------------------|--------------------|-----------------------------|-------------------|---------------------------|-------------------|-------------------|
|                                                     | N Missing                | Statistics        | N Missing              | Statistics        |                    | N Missing                   | Statistics        | N Missing                 | Statistics        |                   |
|                                                     | N=14,897                 |                   | N=7,090                |                   |                    | N=14,963                    |                   | N=7,024                   |                   |                   |
| Female, % [95% CI]                                  | 0                        | 49.9 (48.9, 50.9) | 0                      | 48.6 (47.2, 50.1) | 0.19 <sup>c</sup>  | 0                           | 49.4 (48.6, 50.3) | 0                         | 49.7 (48.3, 51.1) | 0.78 <sup>c</sup> |
| Age at screening (y), mean [95% CI]                 | 0                        | 44.1 (43.5, 44.6) | 0                      | 43.4 (42.8, 44.0) | 0.019 <sup>a</sup> | 0                           | 43.9 (43.4, 44.5) | 0                         | 43.7 (43.0, 44.3) | 0.39 <sup>a</sup> |
| Race, % [95% CI]                                    | 0                        |                   | 0                      |                   | 0.81 <sup>c</sup>  | 0                           |                   | 0                         |                   | 0.31 <sup>c</sup> |
| Non-Hispanic white                                  |                          | 63.3 (59.7, 66.7) |                        | 63.8 (60.2, 67.4) |                    |                             | 63.4 (59.9, 66.8) |                           | 63.5 (59.9, 67.1) |                   |
| Non-Hispanic black                                  |                          | 12.1 (10.5, 14.0) |                        | 11.7 (10.0, 13.6) |                    |                             | 11.9 (10.2, 13.6) |                           | 12.3 (10.5, 14.3) |                   |
| Mexican-American                                    |                          | 9.8 (8.1, 11.9)   |                        | 9.6 (7.7, 11.9)   |                    |                             | 10.0 (8.2, 12.1)  |                           | 9.3 (7.5, 11.2)   |                   |
| Other                                               |                          | 14.8 (13.1, 16.5) |                        | 14.8 (13.1, 16.5) |                    |                             | 14.7 (13.1, 16.4) |                           | 14.9 (13.2, 16.7) |                   |
| Education level, % [95% CI]*                        | 16                       |                   | 7                      |                   | 0.17 <sup>c</sup>  | 14                          |                   | 9                         |                   | 0.43 <sup>c</sup> |
| Less than High School                               |                          | 17.1 (15.6, 18.6) |                        | 15.8 (14.2, 17.6) |                    |                             | 17.0 (15.5, 18.5) |                           | 16.0 (14.3, 17.7) |                   |
| High School/GED/Some College/AA                     |                          | 53.1 (51.6, 54.7) |                        | 53.2 (51.0, 55.3) |                    |                             | 53.0 (51.5, 54.5) |                           | 53.4 (51.1, 55.7) |                   |
| College graduate+                                   |                          | 29.8 (27.7, 32.0) |                        | 31.0 (28.4, 33.7) |                    |                             | 30.0 (28.0, 32.1) |                           | 30.6 (27.8, 33.5) |                   |
| Health insurance, % [95% CI]*                       | 13                       |                   | 9                      |                   | 0.005 <sup>c</sup> | 15                          |                   | 7                         |                   | 0.21 <sup>c</sup> |
| None                                                |                          | 21.0 (19.7, 22.5) |                        | 20.4 (18.8, 22.1) |                    |                             | 21.0 (19.6, 22.5) |                           | 20.4 (18.8, 22.1) |                   |
| Private                                             |                          | 61.2 (59.4, 63.1) |                        | 63.9 (61.5, 66.1) |                    |                             | 61.6 (59.6, 63.6) |                           | 63.1 (61.0, 65.1) |                   |
| Other                                               |                          | 17.7 (16.6, 18.9) |                        | 15.7 (14.4, 17.1) |                    |                             | 17.4 (16.2, 18.6) |                           | 16.5 (15.3, 17.7) |                   |
| Marital status, % [95% CI]                          | 8                        |                   | 3                      |                   | 0.20 <sup>c</sup>  | 8                           |                   | 3                         |                   | 0.28 <sup>c</sup> |
| Married/Widowed                                     |                          | 58.0 (56.4, 59.5) |                        | 57.8 (55.7, 59.9) |                    |                             | 57.4 (55.9, 58.9) |                           | 58.9 (56.7, 61.2) |                   |
| Separated/Divorced                                  |                          | 12.1 (11.4, 12.9) |                        | 11.2 (10.2, 12.3) |                    |                             | 12.0 (11.2, 12.8) |                           | 11.6 (10.6, 12.7) |                   |
| Never married/Living with partner                   |                          | 29.9 (28.2, 31.6) |                        | 31.0 (28.9, 33.1) |                    |                             | 30.6 (29.0, 32.2) |                           | 29.5 (27.2, 31.8) |                   |
| Family PIR, mean [95% CI]*                          | 1350                     | 2.9 (2.9, 3.0)    | 648                    | 3.0 (2.9, 3.1)    | 0.36 <sup>a</sup>  | 1356                        | 2.9 (2.9, 3.0)    | 642                       | 3.0 (2.9, 3.1)    | 0.46 <sup>a</sup> |
| Annual household income, % [95% CI]*                | 1364                     |                   | 656                    |                   | 0.16 <sup>c</sup>  | 1370                        |                   | 650                       |                   | 0.15 <sup>c</sup> |
| Under \$55,000                                      |                          | 48.8 (46.4, 51.3) |                        | 48.3 (45.7, 50.9) |                    |                             | 48.8 (46.4, 51.3) |                           | 48.3 (45.7, 50.9) |                   |
| \$55,000 - \$99,999                                 |                          | 25.8 (24.3, 27.3) |                        | 24.8 (23.1, 26.6) |                    |                             | 25.8 (24.4, 27.3) |                           | 24.7 (22.8, 26.7) |                   |
| \$100,000 and up                                    |                          | 25.4 (23.0, 27.8) |                        | 26.9 (24.2, 29.7) |                    |                             | 25.3 (23.0, 27.8) |                           | 27.0 (24.3, 29.8) |                   |
| Body Mass Index (kg/m <sup>2</sup> ), mean [95% CI] | 201                      | 28.4 (28.2, 28.6) | 59                     | 28.5 (28.3, 28.7) | 0.39 <sup>a</sup>  | 198                         | 28.4 (28.2, 28.6) | 62                        | 28.5 (28.3, 28.8) | 0.28 <sup>a</sup> |
| Smoking status, % [95% CI]*                         | 13                       |                   | 4                      |                   | 0.90 <sup>c</sup>  | 12                          |                   | 5                         |                   | 0.93 <sup>c</sup> |
| Never                                               |                          | 58.0 (56.3, 59.6) |                        | 58.2 (56.4, 60.0) |                    |                             | 58.1 (56.5, 59.6) |                           | 58.0 (56.0, 59.9) |                   |
| Past                                                |                          | 21.4 (20.1, 22.7) |                        | 21.5 (20.2, 22.8) |                    |                             | 21.5 (20.2, 22.8) |                           | 21.3 (19.9, 22.6) |                   |
| Current                                             |                          | 20.7 (19.5, 21.9) |                        | 20.3 (18.9, 21.8) |                    |                             | 20.5 (19.4, 21.6) |                           | 20.8 (19.1, 22.5) |                   |
| Dietary fiber (gm), mean [95% CI]*                  | 1181                     | 17.3 (17.0, 17.6) | 522                    | 17.4 (17.0, 17.7) | 0.80 <sup>a</sup>  | 1211                        | 17.3 (17.0, 17.6) | 492                       | 17.4 (17.0, 17.7) | 0.63 <sup>a</sup> |

|                                                  |      |                      |      |                      |                     |      |                      |      |                      |                   |
|--------------------------------------------------|------|----------------------|------|----------------------|---------------------|------|----------------------|------|----------------------|-------------------|
| HEI-2015 Score, mean [95% CI]                    | 3082 | 53.9 (53.5, 54.4)    | 1409 | 54.2 (53.7, 54.7)    | 0.32 <sup>a</sup>   | 3144 | 54.0 (53.5, 54.4)    | 1347 | 54.1 (53.5, 54.7)    | 0.69 <sup>a</sup> |
| PHQ-9 Depression Severity, % [95% CI]*           | 1716 |                      | 737  |                      | 0.098 <sup>c</sup>  | 1721 |                      | 732  |                      | 0.28 <sup>c</sup> |
| None to Mild 0-9                                 |      | 93.0 (92.4, 93.6)    |      | 93.8 (92.9, 94.6)    |                     |      | 93.1 (92.5, 93.7)    |      | 93.6 (92.8, 94.4)    |                   |
| Moderate to Severe 10+                           |      | 7.0 (6.4, 7.6)       |      | 6.2 (5.4, 7.1)       |                     |      | 6.9 (6.3, 7.5)       |      | 6.4 (5.6, 7.2)       |                   |
| Any vigorous or moderate activities, % [95% CI]* | 6    | 73.5 (72.4, 74.7)    | 3    | 74.2 (72.5, 75.9)    | 0.42 <sup>c</sup>   | 6    | 73.5 (72.3, 74.7)    | 3    | 74.3 (72.6, 76.0)    | 0.39 <sup>c</sup> |
| Creatinine, urine (mg/dL), mean [95% CI]*        | 469  | 125.2 (122.6, 127.7) | 3    | 119.4 (117.0, 121.9) | <0.001 <sup>a</sup> | 470  | 122.6 (120.1, 125.1) | 2    | 124.8 (122.0, 127.6) | 0.12 <sup>a</sup> |

Frequencies presented are unweighted counts.

P-values: a=linear regression; c=Rao-Scott chi-square test.

SAS Survey Procedures with MEC weights used for all analyses.

b.

| Variable                             | Excluded from VOC Subset |                   | Included in VOC Subset |                   | p-value            |
|--------------------------------------|--------------------------|-------------------|------------------------|-------------------|--------------------|
|                                      | N=14,858                 |                   | N=7,129                |                   |                    |
|                                      | N Missing                | Statistics        | N Missing              | Statistics        |                    |
| Female, % [95% CI]                   | 0                        | 50.1 (49.2, 51.1) | 0                      | 48.2 (46.9, 49.5) | 0.029 <sup>c</sup> |
| Age at screening (y), mean [95% CI]  | 0                        | 43.9 (43.2, 44.5) | 0                      | 43.8 (43.2, 44.4) | 0.93 <sup>a</sup>  |
| Race, % [95% CI]                     | 0                        |                   | 0                      |                   | 0.25 <sup>c</sup>  |
| Non-Hispanic white                   |                          | 63.5 (59.8, 67.0) |                        | 63.4 (59.2, 67.5) |                    |
| Non-Hispanic black                   |                          | 12.4 (10.6, 14.4) |                        | 11.2 (9.3, 13.4)  |                    |
| Mexican-American                     |                          | 9.3 (7.6, 11.2)   |                        | 10.8 (8.4, 13.7)  |                    |
| Other                                |                          | 14.9 (13.2, 16.7) |                        | 14.5 (12.7, 16.6) |                    |
| Education level, % [95% CI]*         | 18                       |                   | 5                      |                   | 0.80 <sup>c</sup>  |
| Less than High School                |                          | 16.7 (15.2, 18.3) |                        | 16.6 (14.8, 18.6) |                    |
| High School/GED/Some College/AA      |                          | 52.9 (51.2, 54.6) |                        | 53.7 (51.5, 55.9) |                    |
| College graduate+                    |                          | 30.4 (28.2, 32.7) |                        | 29.7 (26.9, 32.6) |                    |
| Health insurance, % [95% CI]*        | 13                       |                   | 9                      |                   | 0.74 <sup>c</sup>  |
| None                                 |                          | 21.0 (19.6, 22.5) |                        | 20.4 (18.6, 22.4) |                    |
| Private                              |                          | 62.0 (60.1, 64.0) |                        | 62.2 (59.5, 64.8) |                    |
| Other                                |                          | 16.9 (15.7, 18.2) |                        | 17.4 (16.1, 18.8) |                    |
| Marital status, % [95% CI]           | 8                        |                   | 3                      |                   | 0.88 <sup>c</sup>  |
| Married/Widowed                      |                          | 58.0 (56.1, 59.8) |                        | 57.8 (55.9, 59.7) |                    |
| Separated/Divorced                   |                          | 11.7 (11.0, 12.5) |                        | 12.1 (11.0, 13.3) |                    |
| Never married/Living with partner    |                          | 30.3 (28.3, 32.3) |                        | 30.1 (28.1, 32.1) |                    |
| Family PIR, mean [95% CI]*           | 1408                     | 3.0 (2.9, 3.0)    | 590                    | 2.9 (2.8, 3.0)    | 0.83 <sup>a</sup>  |
| Annual household income, % [95% CI]* | 1433                     |                   | 587                    |                   | 0.98 <sup>c</sup>  |
| Under \$55,000                       |                          | 48.6 (46.0, 51.2) |                        | 48.8 (45.7, 51.9) |                    |
| \$55,000 - \$99,999                  |                          | 25.6 (23.9, 27.3) |                        | 25.3 (23.7, 27.0) |                    |

|                                                     |      |                      |      |                      |                    |
|-----------------------------------------------------|------|----------------------|------|----------------------|--------------------|
| \$100,000 and up                                    |      | 25.9 (23.2, 28.7)    |      | 25.9 (23.0, 28.9)    |                    |
| Body Mass Index (kg/m <sup>2</sup> ), mean [95% CI] | 186  | 28.4 (28.2, 28.6)    | 74   | 28.5 (28.3, 28.8)    | 0.33 <sup>a</sup>  |
| Smoking status, % [95% CI]*                         | 14   |                      | 3    |                      | 0.38 <sup>c</sup>  |
| Never                                               |      | 58.1 (56.4, 59.7)    |      | 58.0 (55.9, 60.0)    |                    |
| Past                                                |      | 21.1 (19.7, 22.4)    |      | 22.1 (20.7, 23.6)    |                    |
| Current                                             |      | 20.9 (19.7, 22.1)    |      | 19.9 (18.4, 21.4)    |                    |
| Dietary fiber (gm), mean [95% CI]*                  | 1231 | 17.4 (17.2, 17.7)    | 472  | 17.1 (16.6, 17.5)    | 0.096 <sup>a</sup> |
| HEI-2015 Score, mean [95% CI]                       | 3066 | 54.1 (53.6, 54.5)    | 1425 | 53.9 (53.3, 54.5)    | 0.60 <sup>a</sup>  |
| PHQ-9 Depression Severity, % [95% CI]*              | 1802 |                      | 651  |                      | 0.44 <sup>c</sup>  |
| None to Mild 0-9                                    |      | 93.2 (92.5, 93.8)    |      | 93.5 (92.7, 94.3)    |                    |
| Moderate to Severe 10+                              |      | 6.8 (6.2, 7.5)       |      | 6.5 (5.7, 7.3)       |                    |
| Any vigorous or moderate activities, % [95% CI]*    | 4    | 73.5 (72.3, 74.6)    | 5    | 74.4 (72.8, 76.0)    | 0.24 <sup>c</sup>  |
| Creatinine, urine (mg/dL), mean [95% CI]*           | 384  | 124.3 (121.5, 127.0) | 88   | 121.2 (118.7, 123.8) | 0.062 <sup>a</sup> |

**eFigure 1. Diet quality by group as measured by HEI-2015 (per participant)**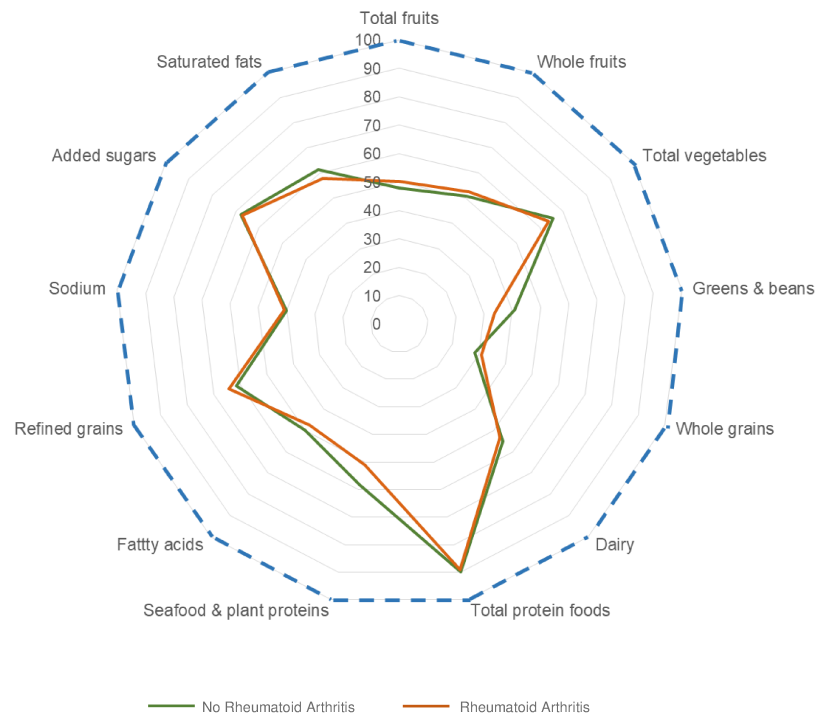

The radar plot is representative of participants who participated in both days of the interview and is similar to an average across the two interview days.

The dotted blue line (---) depicts a perfect 100 point score.

Points closer to the outer edge represent a food pattern that is closer to meeting dietary recommendations.

Points closer to the center of the graph represent a food pattern that has room for improvement.



eTable 5. Stepwise adjustment analysis for each of the variables.

| Factor                                                  | Adjustment 1      |              | Adjustment 2      |              | Adjustment 3      |              | Adjustment 4      |              | Adjustment 5      |              |
|---------------------------------------------------------|-------------------|--------------|-------------------|--------------|-------------------|--------------|-------------------|--------------|-------------------|--------------|
|                                                         | OR (95% CI)       | p-value      | OR (95% CI)       | p-value      | OR (95% CI)       | p-value      | OR (95% CI)       | p-value      | OR (95% CI)       | p-value      |
| Age (1 year increment)                                  | 1.07 (1.06, 1.08) | <0.001       | 1.07 (1.06, 1.08) | <0.001       | 1.07 (1.06, 1.08) | <0.001       | 1.07 (1.06, 1.08) | <0.001       | 1.07 (1.06, 1.08) | <0.001       |
| Female vs. Male                                         | 1.8 (1.2, 2.5)    | <b>0.002</b> | 1.7 (1.2, 2.4)    | <b>0.005</b> | 1.6 (1.2, 2.4)    | <b>0.007</b> | 1.7 (1.2, 2.5)    | <b>0.006</b> | 1.5 (1.05, 2.3)   | <b>0.029</b> |
| Creatinine, urine (1 mg/dL increment)                   | ---               | ---          | 1.00 (1.00, 1.00) | 0.75         | 1.00 (1.00, 1.00) | 0.32         | 1.00 (1.00, 1.00) | 0.48         | 1.00 (1.00, 1.00) | 0.30         |
| BMI (1 kg/m <sup>2</sup> increment)                     | ---               | ---          | ---               | ---          | 1.05 (1.03, 1.08) | <0.001       | 1.05 (1.03, 1.08) | <0.001       | 1.05 (1.02, 1.08) | <0.001       |
| Smoking                                                 |                   |              |                   |              |                   |              |                   |              |                   |              |
| Current vs. Never                                       | ---               | ---          | ---               | ---          | ---               | ---          | 1.4 (0.89, 2.3)   | 0.13         | 1.3 (0.77, 2.1)   | 0.35         |
| Past vs. Never                                          | ---               | ---          | ---               | ---          | ---               | ---          | 1.03 (0.60, 1.8)  | 0.92         | 1.04 (0.60, 1.8)  | 0.88         |
| Race                                                    |                   |              |                   |              |                   |              |                   |              |                   |              |
| Mexican-American vs. Non-Hispanic White                 | ---               | ---          | ---               | ---          | ---               | ---          | ---               | ---          | 1.4 (0.77, 2.6)   | 0.27         |
| Non-Hispanic Black vs. Non-Hispanic White               | ---               | ---          | ---               | ---          | ---               | ---          | ---               | ---          | 1.5 (1.01, 2.1)   | <b>0.045</b> |
| Other vs. Non-Hispanic White                            | ---               | ---          | ---               | ---          | ---               | ---          | ---               | ---          | 0.84 (0.48, 1.5)  | 0.54         |
| High school or less vs. More than high school education | ---               | ---          | ---               | ---          | ---               | ---          | ---               | ---          | 1.06 (0.71, 1.6)  | 0.78         |
| Family poverty income ratio (1 unit increment)          | ---               | ---          | ---               | ---          | ---               | ---          | ---               | ---          | 0.90 (0.78, 1.04) | 0.14         |
| Any moderate and/or vigorous activity                   | ---               | ---          | ---               | ---          | ---               | ---          | ---               | ---          | 0.96 (0.64, 1.4)  | 0.84         |
| Dietary fiber (1 gm increment)                          | ---               | ---          | ---               | ---          | ---               | ---          | ---               | ---          | 0.98 (0.95, 1.02) | 0.34         |
| PAH Body Burden                                         |                   |              |                   |              |                   |              |                   |              |                   |              |
| Quartile 2 vs. 1                                        | 1.5 (0.91, 2.4)   | 0.11         | 1.5 (0.89, 2.5)   | 0.13         | 1.5 (0.89, 2.6)   | 0.13         | 1.5 (0.87, 2.5)   | 0.15         | 1.5 (0.87, 2.5)   | 0.15         |
| Quartile 3 vs. 1                                        | 1.9 (1.2, 3.1)    | <b>0.012</b> | 1.9 (1.2, 3.2)    | <b>0.013</b> | 1.9 (1.1, 3.3)    | <b>0.016</b> | 1.8 (1.03, 3.0)   | <b>0.039</b> | 1.7 (0.97, 3.0)   | 0.066        |
| Quartile 4 vs. 1                                        | 2.6 (1.5, 4.4)    | <0.001       | 2.7 (1.4, 4.9)    | <b>0.002</b> | 2.8 (1.5, 5.0)    | <b>0.001</b> | 2.2 (1.2, 4.4)    | <b>0.018</b> | 2.2 (1.09, 4.2)   | <b>0.028</b> |

---: Not available; Factor not included in the adjustment

PAH subset (n = 7,090) with PAH subsample weights used for analysis

PAH Burden Score includes: 1-hydroxynaphthalene, 2-hydroxynaphthalene, 3-hydroxyfluorene, 2-hydroxyfluorene, 1-hydroxyphenanthrene, and 1-hydroxypyrene

All models were fitted on each of the 5 imputed datasets and parameter estimates were combined using SAS Mianalyze.

**eTable 6. Mediation criteria for PAH body burden**

| Mediation Criteria                                                 | OR (95% CI)        | p-value      | Met Mediation Criteria |
|--------------------------------------------------------------------|--------------------|--------------|------------------------|
| Smoking is associated with RA*                                     | 1.7 (1.3, 2.3)     | <0.001       | Yes                    |
| Smoking is associated with PAH body burden†                        | 87.2 (43.9, 172.8) | <0.001       | Yes                    |
| PAH body burden is associated with RA after adjusting for smoking† | 2.2 (1.09, 4.2)    | <b>0.028</b> | Yes                    |

Abbreviations: OR: Odds Ratio; RA: Rheumatoid Arthritis; PAH: Polycyclic Aromatic Hydrocarbons

**Bold** = Significant with p<0.05

\*Current vs. Never/Past

†Q4 vs. Q1

Model included age, sex (Male vs. Female), race (non-Hispanic White vs. non-Hispanic Black vs. Mexican-American vs. Other), education (high school or less vs. more than high school), family PIR, BMI, urine creatinine, any vigorous or moderate activity (yes vs. no), and dietary fiber.

**eTable 7. Sensitivity analysis examining the associations between PAH body burden quartile and rheumatoid arthritis among never smoker participant subset**

| Variable                 | Adjustment 1    |              | Adjustment 2    |         |
|--------------------------|-----------------|--------------|-----------------|---------|
|                          | OR [95% CI]     | p-value      | OR [95% CI]     | p-value |
| PAH body burden quartile |                 |              |                 |         |
| Quartile 2 vs 1          | 1.6 [0.81, 3.0] | 0.18         | 1.5 [0.71, 3.3] | 0.27    |
| Quartile 3 vs 1          | 2.5 [1.3, 5.1]  | <b>0.008</b> | 2.2 [0.90, 5.4] | 0.082   |
| Quartile 4 vs 1          | 3.0 [1.3, 7.1]  | <b>0.013</b> | 2.5 [0.86, 7.1] | 0.092   |

**Bold** = Significant with p<0.05

Abbreviations: PIR: Poverty Income Ratio; PAH: Polycyclic Aromatic Hydrocarbons; OR: odds ratio

PAH never smokers subset (n = 4,102) with PAH subsample weights used for analysis

PAH Burden Score includes: 1-hydroxynaphthalene, 2-hydroxynaphthalene, 3-hydroxyfluorene, 2-hydroxyfluorene, 1-hydroxyphenanthrene, and 1-hydroxypyrene.

Adjustment 1: Adjusted for age and sex (male vs. female).

Adjustment 2: Adjusted for age, sex (male vs. female), BMI, urine creatinine, race (non-Hispanic white vs. non-Hispanic black vs. Mexican-American vs. other), education (high school or less vs. more than high school), family PIR, any vigorous or moderate activity (yes vs. no), and dietary fiber.

All models were fitted on each of the 5 imputed datasets and parameter estimates were combined using SAS Mianalyze.
